# Supplementary material
Source: PubMed Central journal article supplement (PMC4669592)

**A Randomized Placebo-Controlled Phase III Trial of Yeast Derived GM-CSF VS Peptide Vaccination VS GM-CSF Plus Peptide Vaccination VS Placebo in Patients with "No Evidence of Disease" after Complete Surgical Resection of "Locally Advanced" and/or Stage IV Melanoma: A trial of the ECOG-ACRIN Cancer Research Group (E4697)**

**Lawson, et al**

## **SUPPLEMENTARY MATERIALS**

### **Supplemental Text**

#### **Methods**

##### ***Eligibility criteria:***

Other eligibility criteria included: age  $\geq 18$  years; known HLA-A2 status serologically defined; ECOG performance status of 0-1; adequate organ function; no other malignancy within the past 5 years (except lobular carcinoma in situ (LCIS) of the breast, other CIS, atypical melanocytic hyperplasia, Clark's level I melanoma, basal cell or squamous cell skin cancer); no active infection requiring IV antibiotics; no other significant medical, surgical, or psychiatric condition or requirement for medication that precludes study compliance; ability to self-administer or arrange for administration of subcutaneous injections; no autoimmune disorder or immunosuppressive medication; not pregnant or nursing; use of effective contraception during and for 18 months after study participation; no concurrent systemic corticosteroids, topical steroids or steroid-containing inhalers (concurrent replacement doses of steroids for adrenal insufficiency allowed); no prior treatment with GM-CSF, MART-1:27-35 peptide, tyrosinase:368-376(370D), or gp100:209-217(210M) antigen; no prior adjuvant therapy or limb perfusion after resection(s) that rendered the patient disease-free. Serologic testing of HLA status was sufficient. Subtyping (e.g., HLA-A0201) was not required. One prior systemic regimen after a prior surgery was allowed, but no systemic therapy was allowed following the most recent surgery. Patients had to wait at least 30 days since prior radiotherapy.

##### ***Interim statistical analysis:***

To preserve the overall type I error rate, critical values at the interim analyses were determined using a truncated version of the Lan-DeMets spending function corresponding to the O'Brien-Fleming boundary. Early stopping for futility was conducted using Jennison-Turnbull repeated confidence interval (RCI) method. This design would also provide 80% power to detect 40% relative increase in OS in PV-treated patients (projected 5-year survival: 20% in PV- group and 28% in PV+ group) and 25% relative increase in median RFS (9 months in PV- group and 12 months in PV+ group) using cure rate model. Interim futility analysis was conducted using conditional power method for RFS.

## **Results**

### ***Treatment Characteristics and Study Discontinuation***

Ineligibility was fairly balanced between arms: arm A: 7; arm B: 11; arm C: 14; arm D: 6; arm E: 19; arm F 18. Reasons for ineligibility included: not NED at baseline: 22; did not meet staging or prior treatment criteria: 33; timelines not met, scans not done, history of other malignancy, use of steroids, other: 22. Separate analysis using only eligible patients did not materially change the outcome of the study. This rate of ineligibility is not different from other adjuvant trials in cooperative groups during this era. Reasons include the complex design of the study, because of which we were rigorous in our eligibility review. The one pathology error is not rare in melanoma.

Number of patients not starting therapy was not balanced; arm A: 5; arm B: 1; arm C: 2; arm D: 3; arm E: 4; arm F: 18. Reasons for not starting therapy included:

withdrawal/refusal: 6; no data submitted: 17; disease progression prior to treatment: 4; eligibility/compliance issues: 6.

After the study was activated, pathology reports and other patient information were centrally reviewed for 766 patients. The proportion of concordance between randomization and central review for the 3 stratification factors was 99.8% for HLA-A2 status, 88.1% for site of metastases and 77.9% for number of metastatic lesions. The major error discovered for coding of site of metastases was not scoring lymph nodes as metastatic. The major error for number of metastatic lesions was counting individual nodes as metastases rather than counting a nodal basin as one site of metastasis. Staging was not required at the time of randomization; patients were centrally staged.

Table S1: Reasons for not starting assigned therapy (n=33) and for ineligibility (n=75)

| <b>Treatment arm</b> | <b>Reasons for not starting protocol therapy</b>                                                                                                                                                                                                                                                                                                                                                                                                                                                                                                                                                                                                                                                  |
|----------------------|---------------------------------------------------------------------------------------------------------------------------------------------------------------------------------------------------------------------------------------------------------------------------------------------------------------------------------------------------------------------------------------------------------------------------------------------------------------------------------------------------------------------------------------------------------------------------------------------------------------------------------------------------------------------------------------------------|
| A (n=5)              | Withdrawal (2)<br>No data submitted (3)                                                                                                                                                                                                                                                                                                                                                                                                                                                                                                                                                                                                                                                           |
| B (n=1)              | No data submitted (1)                                                                                                                                                                                                                                                                                                                                                                                                                                                                                                                                                                                                                                                                             |
| C (n=2)              | Withdrawal (1)<br>No data submitted (1)                                                                                                                                                                                                                                                                                                                                                                                                                                                                                                                                                                                                                                                           |
| D (n=3)              | Withdrawal (1)<br>Disease progressed before treatment started (1)<br>No data submitted (1)                                                                                                                                                                                                                                                                                                                                                                                                                                                                                                                                                                                                        |
| E (n=4)              | Patient had recurrence before the start of protocol therapy (1)<br>No data submitted (3)                                                                                                                                                                                                                                                                                                                                                                                                                                                                                                                                                                                                          |
| F (n=18)             | Withdrawal (1)<br>Breast cancer in 1998 (1)<br>Subcutaneous disease on whole body PET scan (1)<br>Confusion about primary (1)<br>Not able to travel from a displaced location (due to hurricane) (1)<br>Not eligible, no satellite or intransit lesions (1)<br>Patient had recurrence before the start of protocol therapy (2)<br>Patient was not compliant (1)<br>Patient refused (1)<br>No data submitted (8)                                                                                                                                                                                                                                                                                   |
| <b>Treatment arm</b> | <b>Reasons for ineligibility</b>                                                                                                                                                                                                                                                                                                                                                                                                                                                                                                                                                                                                                                                                  |
| A (n=7)              | Patient not NED at study entry (4)<br>Patient did not meet staging criteria (2)<br>PS done post reg. Patient non-ulcerated and had 1 node positive (1)                                                                                                                                                                                                                                                                                                                                                                                                                                                                                                                                            |
| B (n=11)             | Patient not NED at study entry (2)<br>Patient does not meet staging criteria (1)<br>Patient did not have extra nodal extension of tumor (one sentinel node pos for melanoma at 1st presentation) (1)<br>Solitary nodal recurrence in previously unresected nodal basin-not ulcerated (1)<br>R Lung nodule removed via chemo but not by surgery per op report 3/17/03 (1)<br>No path report submitted for excision done on 9/8/03 (1)<br>Bilirubin not done within 4 weeks prior to registration (1)<br>Patient had visc disease but imaging > 2 weeks prior to registration (1)<br>LDH > ULN does not meet elig requirement (1)<br>Received prior antibiotics and incomplete nodal dissection (1) |
| C (n=14)             | Patient not NED at study entry (3)<br>Patient did not meet staging criteria (3)<br>Scans are outside the 4 week window (1)<br>Patient not randomized within 16 weeks of surgical resection (1)<br>No PET CT or bone scan done at baseline. Alk. Phos > ULN (1)<br>Surgical resection > 112 days from registration (1)<br>Regional recurrence in untreated nodal basin-primary not said to be ulcerated (1)<br>Patient had lymphoma not melanoma (1)<br>Axillary node dissection not done (1)<br>LDH did not meet eligibility requirements, patient used steroid nasal spray (1)                                                                                                                   |
| D (n=6)              | Patient not NED at study entry (1)<br>Patient did not meet staging criteria (3)<br>Bone scan done prior to registration (1)<br>Recurred before treatment started (1)                                                                                                                                                                                                                                                                                                                                                                                                                                                                                                                              |
| E (n=19)             | Patient not NED at study entry (6)<br>Patient did not meet staging criteria (8)<br>Scans are outside the 4 week window (1)<br>Chest CT > weeks before reg (1)<br>No pre-registration labs done (1)<br>Patient took Flonase (steroid) at baseline (1)<br>Recurred before treatment started (1)                                                                                                                                                                                                                                                                                                                                                                                                     |

|             |                                                                                                                                                                                                                                                                                                                                                                                                                           |
|-------------|---------------------------------------------------------------------------------------------------------------------------------------------------------------------------------------------------------------------------------------------------------------------------------------------------------------------------------------------------------------------------------------------------------------------------|
| F<br>(n=18) | Patient not NED at study entry (6)<br>Patient did not meet staging criteria (4)<br>Patient not randomized within 16 weeks of last surgical resection (1)<br>Brain CT > 8 weeks from registration (2)<br>Had breast cancer in 1998 (1)<br>No complete node dissection-pt recurred in node (1)<br>Patient used steroid inhaler at baseline (1)<br>Margins involved at baseline (1)<br>Recurred before treatment started (1) |
|-------------|---------------------------------------------------------------------------------------------------------------------------------------------------------------------------------------------------------------------------------------------------------------------------------------------------------------------------------------------------------------------------------------------------------------------------|

**Table S2: Treatment Characteristics in Treated Patients**

| Number of patients who completed the GM-CSF/Placebo therapy in each cycle |            |            |            |            |            |            |            |
|---------------------------------------------------------------------------|------------|------------|------------|------------|------------|------------|------------|
| Cycle                                                                     | Arm A      | Arm B      | Arm C      | Arm D      | Arm E      | Arm F      | Total      |
| 1                                                                         | 100        | 108        | 106        | 102        | 185        | 170        | 771        |
| 2                                                                         | 99         | 105        | 103        | 102        | 176        | 167        | 752        |
| 3                                                                         | 92         | 98         | 98         | 96         | 168        | 160        | 712        |
| 4                                                                         | 87         | 85         | 86         | 92         | 154        | 136        | 640        |
| 5                                                                         | 85         | 82         | 80         | 84         | 146        | 130        | 607        |
| 6                                                                         | 79         | 77         | 78         | 81         | 133        | 118        | 566        |
| 7                                                                         | 74         | 71         | 70         | 75         | 125        | 109        | 524        |
| 8                                                                         | 70         | 70         | 64         | 73         | 119        | 101        | 497        |
| 9                                                                         | 67         | 67         | 60         | 72         | 115        | 101        | 482        |
| 10                                                                        | 64         | 63         | 57         | 68         | 109        | 92         | 453        |
| 11                                                                        | 60         | 58         | 53         | 65         | 107        | 87         | 430        |
| 12                                                                        | 58         | 59         | 52         | 61         | 101        | 83         | 414        |
| 13                                                                        | 52         | 54         | 47         | 56         | 95         | 77         | 381        |
| 14                                                                        | 1          | 3          | 2          | 1          | 5          | 4          | 16         |
| 15                                                                        | 1          | 3          | 2          | 1          | 4          | 3          | 14         |
| 16                                                                        | 1          | 1          | 1          | 1          | 2          | 2          | 8          |
| 17                                                                        | 1          | 1          | 0          | 1          | 0          | 2          | 5          |
| 18                                                                        | 1          | 0          | 0          | 0          | 0          | 1          | 2          |
| 19                                                                        | 1          | 0          | 0          | 0          | 0          | 1          | 2          |
| <b>Total</b>                                                              | <b>103</b> | <b>108</b> | <b>106</b> | <b>104</b> | <b>185</b> | <b>171</b> | <b>777</b> |

Note: 1) Of the 815 patients, 782 of them received at least one dose of protocol therapy, treatment data were not submitted for 5 patients, and 777 patients were included in Tables S2A and S2B. 2) The maximal number of cycles was 19 for patients who developed resectable recurrent disease while on treatment, and it was 13 cycles for other patients. Patients who received  $\geq 13$  cycles were considered as completing the protocol therapy.

| Total number of GM-CSF/Placebo cycles patients completed during the whole study |            |            |            |            |            |            |            |
|---------------------------------------------------------------------------------|------------|------------|------------|------------|------------|------------|------------|
| Total # of cycles                                                               | Arm A      | Arm B      | Arm C      | Arm D      | Arm E      | Arm F      | Total      |
| 1                                                                               | 2          | 1          | 2          | 1          | 9          | 3          | 18         |
| 2                                                                               | 8          | 7          | 5          | 4          | 8          | 8          | 40         |
| 3                                                                               | 3          | 10         | 11         | 7          | 14         | 20         | 65         |
| 4                                                                               | 1          | 2          | 6          | 7          | 8          | 9          | 33         |
| 5                                                                               | 5          | 5          | 4          | 3          | 12         | 12         | 41         |
| 6                                                                               | 8          | 6          | 7          | 6          | 8          | 9          | 44         |
| 7                                                                               | 3          | 3          | 6          | 2          | 5          | 6          | 25         |
| 8                                                                               | 1          | 5          | 3          | 2          | 4          | 2          | 17         |
| 9                                                                               | 5          | 6          | 4          | 3          | 6          | 9          | 33         |
| 10                                                                              | 6          | 4          | 4          | 4          | 3          | 6          | 27         |
| 11                                                                              | 3          | 0          | 2          | 4          | 6          | 3          | 18         |
| 12                                                                              | 6          | 5          | 5          | 5          | 7          | 6          | 34         |
| 13                                                                              | 51         | 51         | 45         | 55         | 90         | 74         | 366        |
| 14                                                                              | 0          | 0          | 0          | 0          | 1          | 1          | 2          |
| 15                                                                              | 0          | 2          | 1          | 0          | 2          | 1          | 6          |
| 16                                                                              | 0          | 0          | 1          | 0          | 2          | 0          | 3          |
| 17                                                                              | 0          | 1          | 0          | 1          | 0          | 1          | 3          |
| 19                                                                              | 1          | 0          | 0          | 0          | 0          | 1          | 2          |
| <b>Total</b>                                                                    | <b>103</b> | <b>108</b> | <b>106</b> | <b>104</b> | <b>185</b> | <b>171</b> | <b>777</b> |
| $\geq 13$ cycles (%)                                                            | 52 (50.5)  | 54 (50.0)  | 47 (44.3)  | 56 (53.8)  | 95 (51.4)  | 78 (45.6)  | 382 (49.2) |

Note:  $P > 0.05$  for comparison of % of  $\geq 13$  cycles between treatment arms by Chi square test.

**Table S3: Number of OS and RFS Events by Treatment Arm**

| Events                  | Arm A<br>(n=109) | Arm B<br>(n=111) | Arm C<br>(n=109) | Arm D<br>(n=107) | Arm E<br>(n=190) | Arm F<br>(n=189) | Total<br>(n=815) |
|-------------------------|------------------|------------------|------------------|------------------|------------------|------------------|------------------|
| OS                      |                  |                  |                  |                  |                  |                  |                  |
| Alive                   | 54               | 52               | 50               | 51               | 83               | 82               | 372              |
| Dead                    | 55               | 59               | 59               | 56               | 107              | 107              | 443              |
| Dead with recurrence    | 51               | 57               | 57               | 54               | 96               | 104              | 419              |
| Dead without recurrence | 4                | 2                | 2                | 2                | 11               | 3                | 24               |
| RFS                     |                  |                  |                  |                  |                  |                  |                  |
| No RFS events           | 33               | 36               | 30               | 30               | 50               | 45               | 224              |
| RFS events              | 76               | 75               | 79               | 77               | 140              | 144              | 591              |
| Recurrence              |                  |                  |                  |                  |                  |                  |                  |
| No recurrence           | 37               | 38               | 32               | 32               | 61               | 48               | 248              |
| Recurrence              | 72               | 73               | 77               | 75               | 129              | 141              | 567              |



**Table S4: Univariate stratified Cox Regression Analysis for OS**

| Variables                                                                                           | Level        | HR   | 95% CI |       | P-value |
|-----------------------------------------------------------------------------------------------------|--------------|------|--------|-------|---------|
| GM-CSF (n=815)<br>(stratified on HLA-A2, site and number of metastases)                             | Yes vs. No   | 0.94 | 0.78   | 1.14  | 0.528   |
|                                                                                                     |              |      | 0.77   | 1.15* |         |
| Peptide (n=436)<br>(stratified on GM-CSF, site and number of metastases)                            | Yes vs. No   | 0.93 | 0.71   | 1.21  | 0.598   |
| Treatment in HLA-A2 positive patients (n=436)<br>(stratified on site and number of metastases)      | B vs. A      | 1.15 | 0.79   | 1.67  | 0.462   |
|                                                                                                     | C vs. A      | 1.13 | 0.78   | 1.64  | 0.516   |
|                                                                                                     | D vs. A      | 1.12 | 0.77   | 1.64  | 0.550   |
| Treatment in HLA-A2 negative patients (n=379)<br>(stratified on site and number of metastases)      | F vs. E      | 1.06 | 0.80   | 1.39  | 0.690   |
| HLA-A2 in patients without peptide (n=595)<br>(stratified on GM-CSF, site and number of metastases) | Positive vs. | 0.97 | 0.77   | 1.22  | 0.792   |

Note:

1) HR>1 indicated an increased hazard for death (i.e., worse survival).

2) PH assumption was met for all models by Schoenfeld residuals method.

\*: repeated CI, adjusting for previous interim analyses

**Table S5: Multivariable stratified Cox models for OS**

| Variables                                                                                           | Level        | HR   | 95% CI |      | P-value |
|-----------------------------------------------------------------------------------------------------|--------------|------|--------|------|---------|
| GM-CSF (n=810)<br>(stratified on HLA-A2, site and number of metastases)                             | Yes vs. No   | 0.93 | 0.76   | 1.13 | 0.456   |
| Peptide (n=433)<br>(stratified on GM-CSF, site and number of                                        | Yes vs. No   | 0.97 | 0.74   | 1.27 | 0.814   |
| Treatment in HLA-A2 positive patients (n=433)<br>(stratified on site and number of metastases)      | B vs. A      | 1.18 | 0.80   | 1.73 | 0.395   |
|                                                                                                     | C vs. A      | 1.11 | 0.76   | 1.63 | 0.582   |
|                                                                                                     | D vs. A      | 1.08 | 0.73   | 1.58 | 0.714   |
| Treatment in HLA-A2 negative patients (n=377)<br>(stratified on site and number of metastases)      | F vs. E      | 1.09 | 0.82   | 1.45 | 0.545   |
| HLA-A2 in patients without peptide (n=593)<br>(stratified on GM-CSF, site and number of metastases) | Positive vs. | 0.96 | 0.76   | 1.22 | 0.768   |

Note:

1) HR>1 indicated an increased hazard for death (i.e., worse survival).

2) PH assumption was met for all models by Schoenfeld residuals method.

3) Adjusted covariates were same in all models, which included age, gender, ECOG PS, ulceration at primary site, depth of invasion of primary disease (Clark level), number of positive nodes, disease stage at study entry, and prior immunotherapy.

4) Four patients had missing value for ECOG PS and 1 patient had missing value for gender, these patients were excluded from the multivariable Cox models for OS.

**Table S6: Univariate Stratified Cox Regression Analysis for RFS**

| Variables                                                                                           | Level        | HR   | 95% CI |       | P-value |
|-----------------------------------------------------------------------------------------------------|--------------|------|--------|-------|---------|
| GM-CSF (n=815)<br>(stratified on HLA-A2, site and number of metastases)                             | Yes vs. No   | 0.88 | 0.75   | 1.04  | 0.132   |
| Peptide (n=436)<br>(stratified on GM-CSF, site and number of                                        | Yes vs. No   | 0.96 | 0.76   | 1.20  | 0.708   |
|                                                                                                     |              |      | 0.74   | 1.23* |         |
| Treatment in HLA-A2 positive patients (n=436)<br>(stratified on site and number of metastases)      | B vs. A      | 1.09 | 0.79   | 1.50  | 0.609   |
|                                                                                                     | C vs. A      | 1.05 | 0.76   | 1.46  | 0.747   |
|                                                                                                     | D vs. A      | 1.12 | 0.81   | 1.56  | 0.475   |
| Treatment in HLA-A2 negative patients (n=379)<br>(stratified on site and number of metastases)      | F vs. E      | 1.20 | 0.95   | 1.53  | 0.130   |
| HLA-A2 in patients without peptide (n=595)<br>(stratified on GM-CSF, site and number of metastases) | Positive vs. | 0.93 | 0.76   | 1.13  | 0.458   |

Note:

1) HR>1 indicated an increased hazard for disease recurrence or death (i.e., worse RFS).

2) PH assumption was met for all models by Schoenfeld residuals method.

\*: repeated CI, adjusting for previous interim analyses

**Table S7: Multivariable stratified Cox models for RFS**

| Variables                                                                                           | Level        | HR   | 95% CI |      | P-value |
|-----------------------------------------------------------------------------------------------------|--------------|------|--------|------|---------|
| GM-CSF (n=810)<br>(stratified on HLA-A2, site and number of metastases)                             | Yes vs. No   | 0.88 | 0.74   | 1.04 | 0.129   |
| Peptide (n=433)<br>(stratified on GM-CSF, site and number of                                        | Yes vs. No   | 0.95 | 0.75   | 1.20 | 0.649   |
| Treatment in HLA-A2 positive patients (n=433)<br>(stratified on site and number of metastases)      | B vs. A      | 1.12 | 0.81   | 1.56 | 0.491   |
|                                                                                                     | C vs. A      | 1.10 | 0.79   | 1.52 | 0.578   |
|                                                                                                     | D vs. A      | 1.14 | 0.81   | 1.59 | 0.448   |
| Treatment in HLA-A2 negative patients (n=377)<br>(stratified on site and number of metastases)      | F vs. E      | 1.19 | 0.93   | 1.53 | 0.163   |
| HLA-A2 in patients without peptide (n=593)<br>(stratified on GM-CSF, site and number of metastases) | Positive vs. | 0.93 | 0.76   | 1.14 | 0.482   |

Note:

1) HR>1 indicated an increased hazard for disease recurrence or death (i.e., worse RFS).

2) PH assumption was met for all models by Schoenfeld residuals method.

3) Adjusted covariates were same in all models, which included age, gender, ECOG PS, ulceration at primary site, depth of invasion of primary disease (Clark level), number of positive nodes, disease stage at study entry, and prior immunotherapy.

4) Four patients had missing value for ECOG PS and 1 patient had missing value for gender, the 5 patients were excluded from the multivariable Cox models for RFS.

**Table S8: Incidence of Grade 3-5 Adverse Events in Treated Patients (n=782) regardless of treatment attribution**

| AEs type                          | Treatment Arm |     |     |           |     |     |           |     |     |           |     |     |          |     |     |          |     |   |
|-----------------------------------|---------------|-----|-----|-----------|-----|-----|-----------|-----|-----|-----------|-----|-----|----------|-----|-----|----------|-----|---|
|                                   | A (n=104)     |     |     | B (n=110) |     |     | C (n=107) |     |     | D (n=104) |     |     | E(n=186) |     |     | F(n=171) |     |   |
|                                   | Grade         |     |     | Grade     |     |     | Grade     |     |     | Grade     |     |     | Grade    |     |     | Grade    |     |   |
|                                   | 3             | 4   | 5   | 3         | 4   | 5   | 3         | 4   | 5   | 3         | 4   | 5   | 3        | 4   | 5   | 3        | 4   | 5 |
| (n)                               | (n)           | (n) | (n) | (n)       | (n) | (n) | (n)       | (n) | (n) | (n)       | (n) | (n) | (n)      | (n) | (n) | (n)      | (n) |   |
| Allergic reaction                 | 1             | -   | -   | 1         | -   | -   | 1         | -   | -   | 1         | -   | -   | 1        | -   | -   | -        | -   | - |
| Inner ear/hearing                 | -             | -   | -   | -         | -   | -   | 1         | -   | -   | -         | -   | -   | -        | -   | -   | -        | -   | - |
| Hearing-other                     | 1             | -   | -   | -         | -   | -   | -         | -   | -   | -         | -   | -   | -        | -   | -   | -        | -   | - |
| Hemoglobin                        | -             | -   | -   | -         | -   | -   | -         | -   | -   | 3         | -   | -   | -        | -   | -   | 1        | -   | - |
| Leukocytes                        | -             | -   | -   | -         | -   | -   | 2         | -   | -   | 1         | -   | -   | -        | -   | -   | -        | -   | - |
| Neutrophils                       | 2             | -   | -   | 2         | -   | -   | -         | 2   | -   | 3         | 1   | -   | 2        | 3   | -   | 1        | 1   | - |
| Supraventricular arrhythmias      | -             | -   | -   | -         | -   | -   | -         | -   | -   | -         | -   | -   | 1        | -   | -   | -        | -   | - |
| Arrhythmia-other                  | -             | -   | -   | -         | -   | -   | -         | -   | -   | 1         | -   | -   | -        | -   | -   | -        | 1   | - |
| Cardiac-ischemia                  | 2             | 2   | -   | -         | 1   | -   | -         | 1   | -   | -         | -   | -   | -        | -   | -   | -        | -   | - |
| Cardiac troponin I                | -             | 1   | -   | -         | -   | -   | -         | -   | -   | -         | -   | -   | -        | -   | -   | -        | -   | - |
| Edema                             | 1             | -   | -   | -         | -   | -   | -         | -   | -   | -         | -   | -   | -        | -   | -   | -        | -   | - |
| Hypertension                      | 1             | -   | -   | -         | -   | -   | -         | -   | -   | -         | -   | -   | 1        | -   | -   | -        | -   | - |
| Pericardial effusion/pericarditis | -             | 1   | -   | -         | -   | -   | -         | -   | -   | -         | -   | -   | -        | -   | -   | -        | 1   | - |
| Phlebitis                         | -             | -   | -   | -         | -   | -   | -         | -   | -   | -         | -   | -   | 1        | -   | -   | -        | -   | - |
| Thrombosis/embolism               | 1             | -   | -   | -         | -   | -   | -         | 1   | -   | -         | -   | -   | 1        | -   | -   | 1        | 1   | - |
| Cardiac-other                     | -             | -   | -   | -         | -   | -   | -         | -   | -   | -         | -   | -   | 1        | 1   | -   | -        | -   | - |
| Fatigue                           | 1             | -   | -   | 1         | -   | -   | 3         | -   | -   | 1         | -   | -   | 4        | -   | -   | 4        | -   | - |
| Weight gain                       | -             | -   | -   | -         | -   | -   | -         | -   | -   | -         | -   | -   | -        | -   | -   | 1        | -   | - |
| Weight loss                       | -             | -   | -   | -         | -   | -   | -         | -   | -   | 1         | -   | -   | -        | -   | -   | 1        | -   | - |
| Constitutional                    | -             | -   | -   | -         | -   | 1   | -         | -   | -   | -         | -   | 1   | -        | -   | -   | -        | 1   | - |
| PTT                               | -             | -   | -   | 1         | -   | -   | -         | -   | -   | -         | -   | -   | -        | -   | -   | -        | -   | - |
| PT                                | -             | -   | -   | -         | -   | -   | -         | -   | -   | -         | -   | -   | 1        | -   | -   | 2        | -   | - |
| Flushing                          | -             | -   | -   | 1         | -   | -   | -         | -   | -   | -         | -   | -   | -        | -   | -   | -        | -   | - |
| Injection site reaction           | 2             | -   | -   | 9         | -   | -   | 2         | -   | -   | 2         | -   | -   | 1        | -   | -   | 1        | -   | - |
| Pruritus                          | -             | -   | -   | -         | -   | -   | 1         | -   | -   | -         | -   | -   | -        | -   | -   | -        | -   | - |
| Rash/desquamation                 | 1             | 1   | -   | 1         | -   | -   | 1         | -   | -   | -         | -   | -   | 2        | -   | -   | -        | -   | - |
| Urticaria                         | 1             | -   | -   | 1         | -   | -   | -         | -   | -   | -         | -   | -   | 1        | -   | -   | -        | -   | - |
| Wound - infectious                | -             | -   | -   | -         | -   | -   | -         | -   | -   | -         | -   | -   | 1        | -   | -   | -        | -   | - |
| Skin-other                        | -             | -   | -   | -         | -   | -   | 1         | -   | -   | 1         | -   | -   | -        | -   | -   | -        | -   | - |
| Hot flashes                       | -             | -   | -   | -         | -   | -   | 1         | -   | -   | -         | -   | -   | -        | -   | -   | -        | -   | - |
| SIADH                             | -             | -   | -   | -         | -   | -   | -         | -   | -   | -         | -   | -   | 1        | -   | -   | -        | -   | - |
| Anorexia                          | -             | -   | -   | -         | -   | -   | -         | -   | -   | -         | -   | -   | 1        | -   | -   | -        | -   | - |
| Ascites                           | -             | -   | -   | -         | -   | -   | -         | -   | -   | -         | -   | -   | -        | -   | -   | 1        | -   | - |
| Colitis                           | -             | -   | -   | -         | -   | -   | 1         | -   | -   | -         | -   | -   | -        | -   | -   | -        | -   | - |
| Constipation                      | -             | -   | -   | -         | -   | -   | -         | -   | -   | 1         | -   | -   | -        | -   | -   | -        | -   | - |
| Dehydration                       | -             | -   | -   | 1         | -   | -   | -         | -   | -   | -         | -   | -   | 1        | -   | -   | -        | -   | - |
| Dyspepsia                         | -             | -   | -   | -         | -   | -   | -         | -   | -   | 1         | -   | -   | -        | -   | -   | -        | -   | - |
| Nausea                            | 1             | -   | -   | 2         | -   | -   | -         | -   | -   | -         | -   | -   | 1        | -   | -   | 1        | -   | - |
| Pancreatitis                      | -             | -   | -   | 1         | -   | -   | -         | -   | -   | -         | -   | -   | -        | -   | -   | -        | -   | - |
| Vomiting                          | 1             | -   | -   | 2         | 1   | -   | -         | -   | -   | 1         | -   | -   | -        | -   | -   | 1        | -   | - |
| Diarrhea w/o prior colostomy      | -             | -   | -   | -         | -   | -   | 1         | -   | -   | -         | -   | -   | -        | -   | -   | 2        | -   | - |
| GI-other                          | -             | -   | -   | -         | -   | -   | 1         | -   | -   | -         | -   | -   | -        | -   | -   | -        | 1   | - |
| CNS hemorrhage                    | -             | -   | -   | -         | -   | -   | -         | -   | -   | 1         | -   | -   | -        | -   | 1   | -        | -   | - |
| Hematuria                         | -             | -   | -   | -         | -   | -   | -         | -   | -   | -         | -   | -   | -        | -   | -   | 2        | -   | - |
| Melena/GI bleeding                | -             | -   | -   | -         | -   | -   | -         | -   | -   | 2         | -   | -   | -        | 1   | -   | -        | -   | - |
| Bilirubin                         | -             | -   | -   | 1         | -   | -   | 2         | -   | -   | 2         | 1   | -   | 2        | -   | -   | 2        | -   | - |

| AEs type                  | Treatment Arm |          |          |           |          |          |           |          |          |           |          |          |           |           |          |           |          |          |   |
|---------------------------|---------------|----------|----------|-----------|----------|----------|-----------|----------|----------|-----------|----------|----------|-----------|-----------|----------|-----------|----------|----------|---|
|                           | A (n=104)     |          |          | B (n=110) |          |          | C (n=107) |          |          | D (n=104) |          |          | E(n=186)  |           |          | F(n=171)  |          |          |   |
|                           | Grade         |          |          | Grade     |          |          | Grade     |          |          | Grade     |          |          | Grade     |           |          | Grade     |          |          |   |
|                           | 3             | 4        | 5        | 3         | 4        | 5        | 3         | 4        | 5        | 3         | 4        | 5        | 3         | 4         | 5        | 3         | 4        | 5        |   |
| (n)                       | (n)           | (n)      | (n)      | (n)       | (n)      | (n)      | (n)       | (n)      | (n)      | (n)       | (n)      | (n)      | (n)       | (n)       | (n)      | (n)       | (n)      |          |   |
| SGOT                      | -             | -        | -        | -         | -        | -        | 1         | -        | -        | -         | -        | -        | -         | 2         | -        | -         | 1        | -        | - |
| SGPT                      | -             | -        | -        | -         | -        | -        | 1         | -        | -        | -         | -        | -        | -         | -         | -        | -         | -        | -        | - |
| Infection w/ grade 3 or 4 | -             | -        | -        | -         | -        | -        | -         | -        | -        | -         | -        | -        | -         | -         | -        | -         | 1        | -        | - |
| Infection w/ unknown ANC  | -             | -        | -        | 2         | -        | -        | -         | -        | -        | -         | -        | -        | 2         | -         | -        | 2         | -        | -        |   |
| Infection w/o neutropenia | -             | 1        | -        | 1         | -        | -        | -         | -        | -        | -         | -        | 3        | -         | -         | 1        | -         | -        |          |   |
| Infection-other           | -             | -        | -        | -         | -        | -        | -         | -        | -        | -         | -        | -        | -         | -         | 1        | -         | -        |          |   |
| Lymphatics                | -             | -        | -        | 1         | -        | -        | -         | -        | -        | -         | -        | -        | -         | -         | -        | -         | -        |          |   |
| Lymphatics-other          | -             | -        | -        | -         | -        | 1        | -         | -        | -        | -         | -        | -        | -         | -         | -        | -         | -        |          |   |
| Acidosis                  | -             | 1        | -        | -         | -        | -        | -         | -        | -        | -         | -        | -        | -         | -         | -        | -         | -        |          |   |
| Hyperglycemia             | -             | -        | -        | -         | -        | -        | -         | -        | 1        | -         | -        | -        | -         | -         | -        | -         | -        |          |   |
| Hypokalemia               | -             | -        | -        | -         | -        | -        | -         | -        | -        | -         | -        | 1        | -         | -         | 1        | -         | -        |          |   |
| Metabolic-other           | 1             | -        | -        | -         | -        | -        | -         | -        | -        | -         | -        | -        | -         | -         | -        | -         | -        |          |   |
| Arthritis                 | -             | -        | -        | 1         | -        | -        | -         | -        | -        | -         | -        | -        | -         | -         | -        | -         | -        |          |   |
| Muscle weakness           | -             | -        | -        | -         | -        | -        | -         | -        | 1        | -         | -        | -        | -         | -         | -        | -         | -        |          |   |
| Joint, muscle, bone-other | 2             | -        | -        | -         | -        | -        | -         | -        | -        | -         | -        | -        | -         | -         | -        | -         | -        |          |   |
| Ataxia                    | -             | -        | -        | -         | -        | -        | -         | -        | 1        | -         | -        | 1        | -         | -         | -        | -         | -        |          |   |
| Cerebrovascular ischemia  | -             | -        | -        | -         | -        | -        | -         | -        | -        | -         | -        | -        | 1         | -         | -        | -         | -        |          |   |
| Confusion                 | 1             | -        | -        | -         | -        | -        | -         | -        | 1        | -         | -        | -        | -         | -         | -        | -         | -        |          |   |
| Dizziness/lightheadedness | -             | -        | -        | 1         | -        | -        | -         | -        | -        | -         | -        | -        | -         | -         | -        | -         | -        |          |   |
| Hallucinations            | -             | -        | -        | -         | -        | -        | -         | -        | 1        | -         | -        | -        | -         | -         | -        | -         | -        |          |   |
| Insomnia                  | -             | -        | -        | -         | -        | -        | -         | -        | -        | -         | -        | 1        | -         | -         | -        | -         | -        |          |   |
| Anxiety/agitation         | -             | -        | -        | -         | -        | 1        | -         | -        | -        | -         | -        | -        | -         | -         | -        | -         | -        |          |   |
| Depression                | -             | -        | -        | -         | -        | 1        | -         | -        | -        | -         | -        | 2        | -         | -         | -        | -         | -        |          |   |
| Neuropathy-cranial        | -             | -        | -        | -         | -        | -        | -         | -        | -        | -         | -        | 1        | -         | -         | 1        | -         | -        |          |   |
| Neuropathy-motor          | 1             | -        | -        | -         | 1        | -        | -         | -        | -        | -         | -        | 2        | 1         | -         | 2        | -         | -        |          |   |
| Neuropathy-sensory        | -             | -        | -        | -         | 1        | -        | -         | -        | -        | -         | -        | 1        | -         | -         | -        | -         | -        |          |   |
| Seizure                   | -             | -        | -        | -         | -        | -        | -         | -        | 1        | -         | -        | -        | -         | -         | 1        | -         | -        |          |   |
| Speech impairment         | -             | -        | -        | -         | -        | -        | -         | -        | 1        | -         | -        | -        | -         | -         | -        | -         | -        |          |   |
| Syncope                   | 1             | -        | -        | -         | -        | 1        | -         | -        | -        | -         | -        | 3        | -         | -         | -        | -         | -        |          |   |
| Neurologic-other          | -             | -        | 1        | -         | -        | -        | -         | -        | -        | -         | -        | -        | -         | -         | -        | -         | -        |          |   |
| Glaucoma                  | -             | -        | -        | 1         | -        | -        | -         | -        | -        | -         | -        | -        | -         | -         | -        | -         | -        |          |   |
| Ocular-other              | -             | -        | -        | -         | -        | 1        | -         | -        | -        | -         | -        | -        | -         | -         | -        | -         | -        |          |   |
| Abdominal pain            | -             | -        | -        | 1         | -        | 1        | -         | -        | 2        | -         | -        | 1        | -         | -         | 1        | -         | -        |          |   |
| Arthralgia                | -             | -        | -        | 1         | -        | 5        | -         | -        | -        | -         | -        | 2        | -         | -         | -        | -         | -        |          |   |
| Bone pain                 | -             | -        | -        | -         | -        | -        | -         | -        | 1        | -         | -        | 4        | 1         | -         | 2        | -         | -        |          |   |
| Chest pain                | -             | -        | -        | -         | 1        | 1        | -         | -        | -        | -         | -        | 4        | -         | -         | 2        | -         | -        |          |   |
| Headache                  | 4             | -        | -        | 1         | 1        | -        | -         | -        | 2        | -         | -        | 8        | -         | -         | -        | -         | -        |          |   |
| Myalgia                   | 1             | -        | -        | 2         | -        | 2        | 1         | -        | 1        | -         | -        | 1        | -         | -         | 1        | -         | -        |          |   |
| Neuropathic pain          | -             | -        | -        | -         | -        | -        | -         | -        | 1        | -         | -        | -        | -         | -         | -        | -         | -        |          |   |
| Pleuritic pain            | 1             | -        | -        | -         | -        | -        | -         | -        | -        | -         | -        | -        | -         | -         | -        | -         | -        |          |   |
| Pain-other                | 2             | -        | -        | 2         | -        | 1        | 1         | -        | -        | -         | -        | 3        | -         | -         | 3        | -         | -        |          |   |
| Cough                     | -             | -        | -        | -         | -        | -        | -         | -        | -        | -         | -        | -        | -         | -         | 2        | -         | -        |          |   |
| Dyspnea                   | 1             | 1        | -        | 1         | 1        | -        | -         | -        | -        | -         | -        | 4        | 1         | -         | 2        | -         | -        |          |   |
| Hypoxia                   | 1             | -        | -        | -         | -        | -        | -         | -        | 1        | -         | -        | -        | -         | -         | -        | -         | -        |          |   |
| Pleural effusion          | -             | -        | -        | -         | -        | -        | -         | -        | -        | -         | -        | 1        | -         | -         | -        | -         | -        |          |   |
| Pulmonary-other           | -             | 1        | -        | 1         | -        | 1        | -         | -        | -        | -         | -        | 1        | -         | -         | 1        | -         | -        |          |   |
| Bladder spasms            | 1             | -        | -        | -         | -        | -        | -         | -        | -        | -         | -        | -        | -         | -         | -        | -         | -        |          |   |
| Creatinine                | -             | -        | -        | -         | -        | -        | -         | -        | 1        | -         | -        | -        | 1         | -         | 1        | -         | -        |          |   |
| <b>WORST DEGREE</b>       | <b>23</b>     | <b>6</b> | <b>1</b> | <b>21</b> | <b>3</b> | <b>1</b> | <b>18</b> | <b>5</b> | <b>-</b> | <b>22</b> | <b>2</b> | <b>1</b> | <b>40</b> | <b>10</b> | <b>1</b> | <b>24</b> | <b>5</b> | <b>-</b> |   |

**Table S9: Deaths While on Treatment Reported by AdEERS**

| Treatment Arm | AEs Type         | Description                                                                                                                                                                                                                                                                                                                                                        |
|---------------|------------------|--------------------------------------------------------------------------------------------------------------------------------------------------------------------------------------------------------------------------------------------------------------------------------------------------------------------------------------------------------------------|
| A             | Neurologic-other | Patient died on last day of cycle 4.<br>Nervous system disorders -Other, specify: brain aneurysm, which was attributed to congenital arterial aneurysm (attribution code was definite) and aspirin (attribution code was possible).<br>Attribution code for protocol therapy was unlikely, and attribution code for melanoma was unlikely based on NCI assessment. |
| E             | CNS hemorrhage   | Patient died on day 15 in cycle 7.<br>Massive hemorrhage in left cerebellar hemisphere, probably due to melanoma metastasis, and one possible reason is h/o hypertension.<br>Attribution code for protocol therapy was unlikely and attribution code for melanoma was probable based on NCI assessment.                                                            |
| B             | Constitutional   | Patient died on last day of cycle 2 due to melanoma metastases (attribution code was definite).<br>General disorders and administration site conditions - Other, specify: extensive recurrent metastatic melanoma of liver and spleen.<br>Attribution code for protocol therapy was unlikely.                                                                      |
| D             | Constitutional   | Patient died on day 19 in cycle 2 due to progressive disease.<br>General disorders and administration site conditions - Other, specify: Death - Disease Progression NOS (2 mets, visceral + non-visceral).<br>Attribution code for protocol therapy was unrelated based on NCI assessment.                                                                         |
| A             | Dyspnea          | Patient died on day 20 in cycle 5.<br>General disorders and administration site conditions –other, specify progressive disease.<br>Attribution code for protocol therapy was unlikely, and attribution code for melanoma was definite based on NCI assessment.                                                                                                     |
| D             | Constitutional   | Patient died in cycle 2.<br>General disorders and administration site conditions –other, specify progressive disease.<br>Attribution code for protocol therapy was unlikely, and attribution code for melanoma was probable based on NCI assessment.                                                                                                               |
| F             | Death NOS        | Patient died in cycle 7 from melanoma and h/o depression (attribution code was possible for both).<br>Attribution code for protocol therapy was unrelated based on NCI assessment.                                                                                                                                                                                 |
| E             | Constitutional   | Patient died in cycle 2.<br>General disorders and administration site conditions –other, specify progressive disease.<br>Attribution code for protocol therapy was unrelated, and attribution code for melanoma was definite based on NCI                                                                                                                          |

|  |  |             |
|--|--|-------------|
|  |  | assessment. |
|--|--|-------------|

Note: Four of the 8 patients were considered grade 5 adverse events in the ECOG study data base. The other 4 cases were not recorded in the ECOG data base as of Oct 8, 2012.

**Table S10: Number and Site of Second Primary Cancer**

| Site of second primary cancer  | Arm A<br>(n=109) | Arm B<br>(n=111) | Arm C<br>(n=109) | Arm D<br>(n=107) | Arm E<br>(n=190) | Arm F<br>(n=189) | Total<br>(n=815) |
|--------------------------------|------------------|------------------|------------------|------------------|------------------|------------------|------------------|
| Breast                         | 0                | 0                | 2                | 1                | 0                | 2                | 5                |
| Colon                          | 1                | 1                | 0                | 0                | 0                | 0                | 2                |
| Rectum                         | 0                | 0                | 0                | 0                | 1                | 0                | 1                |
| Gastric                        | 1                | 0                | 0                | 0                | 0                | 0                | 1                |
| Pancreas                       | 0                | 0                | 0                | 1                | 0                | 1                | 2                |
| Esophagus                      | 0                | 0                | 0                | 0                | 2                | 0                | 2                |
| Brain tumor                    | 0                | 0                | 0                | 0                | 1                | 0                | 1                |
| Non-Hodgkins lymphoma          | 0                | 0                | 0                | 0                | 1                | 0                | 1                |
| Acute lymphocytic leukemia-ALL | 0                | 0                | 0                | 0                | 1                | 0                | 1                |
| Small cell lung                | 0                | 0                | 0                | 0                | 1                | 0                | 1                |
| Non-small cell lung            | 1                | 0                | 0                | 0                | 0                | 0                | 1                |
| Melanoma                       | 1                | 0                | 2                | 2                | 2                | 5                | 12               |
| Basal cell carcinoma           | 2                | 6                | 2                | 4                | 7                | 7                | 28               |
| Skin cancer, not melanoma      | 2                | 1                | 5                | 3                | 2                | 17               | 30               |
| Ovarian                        | 0                | 1                | 0                | 0                | 0                | 0                | 1                |
| Renal cell                     | 0                | 0                | 0                | 0                | 1                | 2                | 3                |
| Bladder, urinary track         | 0                | 0                | 0                | 0                | 0                | 1                | 1                |
| Prostate                       | 1                | 2                | 1                | 1                | 3                | 1                | 9                |
| Unknown site                   | 1                | 0                | 3                | 0                | 10               | 2                | 16               |
| <b>Total</b>                   | <b>10</b>        | <b>11</b>        | <b>15</b>        | <b>12</b>        | <b>32</b>        | <b>38</b>        | <b>118</b>       |

Note: A total of 73 patients developed second primary cancer during the study period, 55 of them had one second primary cancer and 18 patients had multiple new cancers.

**Figure S1A: OS by HLA-A2 Status in All Patients (n=815)**

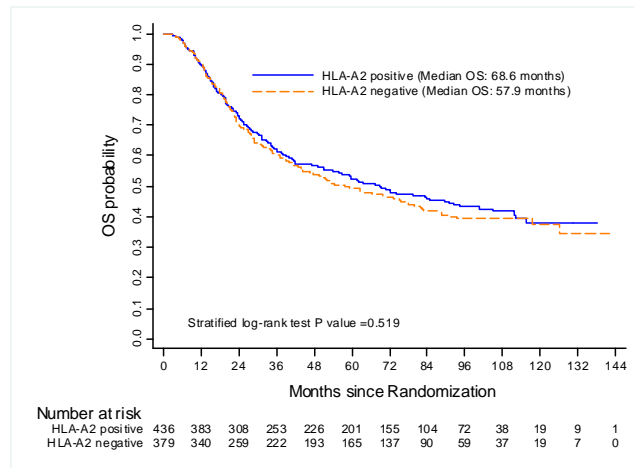

**Figure S1B: RFS by HLA-A2 Status in All Patients (n=815)**

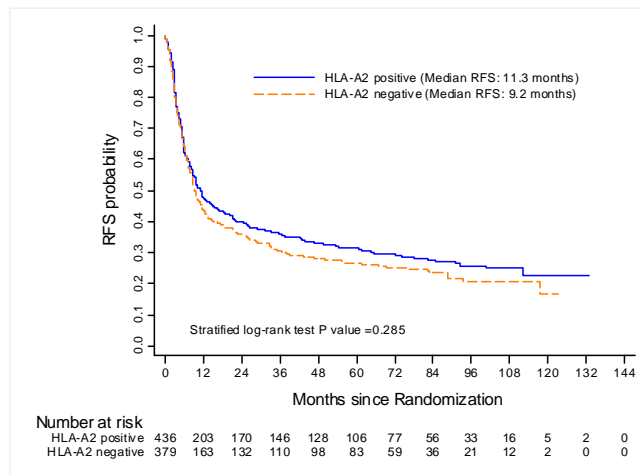



**Figure S2: Effect of Systemic GM-CSF in combination with peptide vaccination on OS in HLA-A2+ Patients (n=436)**

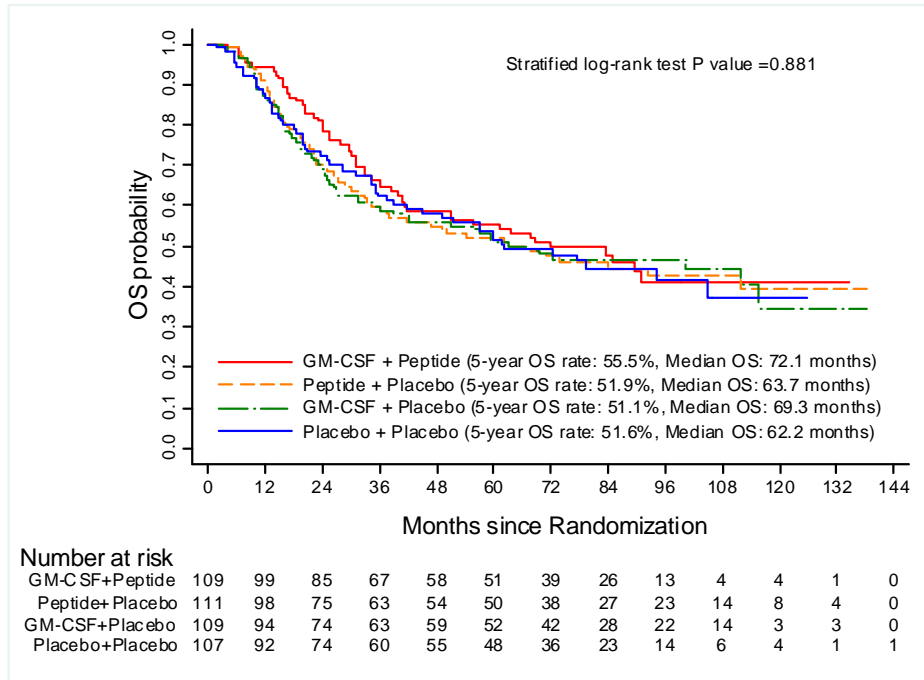

Figure S3A: OS by GM-CSF vs Placebo in patients with stage M1b/M1c disease at study entry

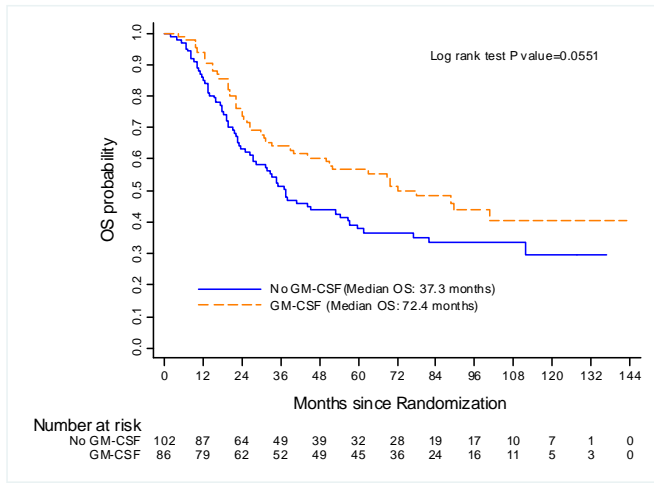

Figure S3B: OS by GM-CSF in patients with stage IV disease at study entry

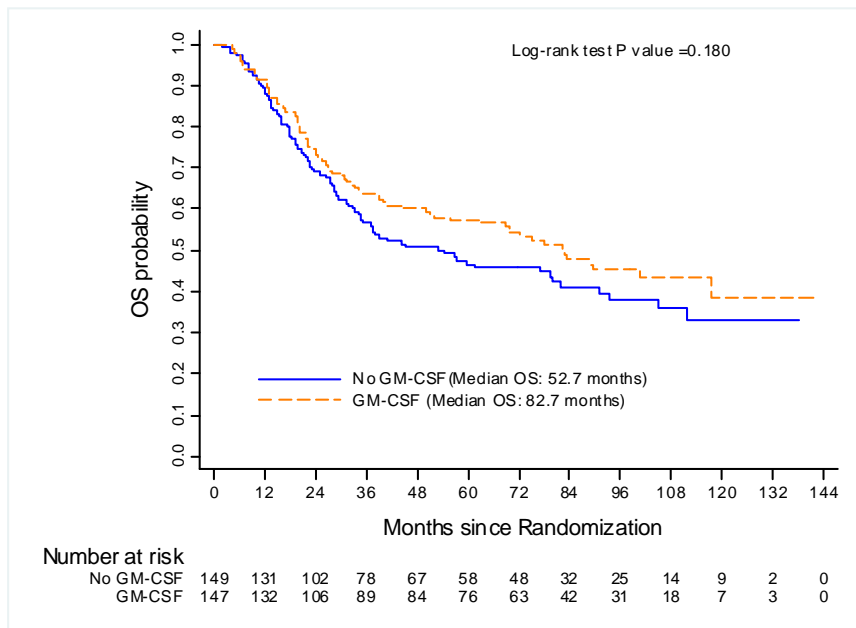

Figure S4A: RFS by peptide vaccine in HLA-A2+ patients with stage M1b/M1c disease at study entry

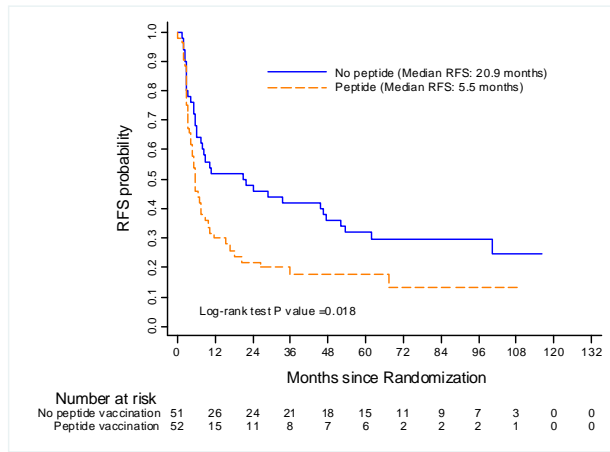

Figure S4B: OS by peptide vaccine in patients with stage M1b/M1c disease at study entry

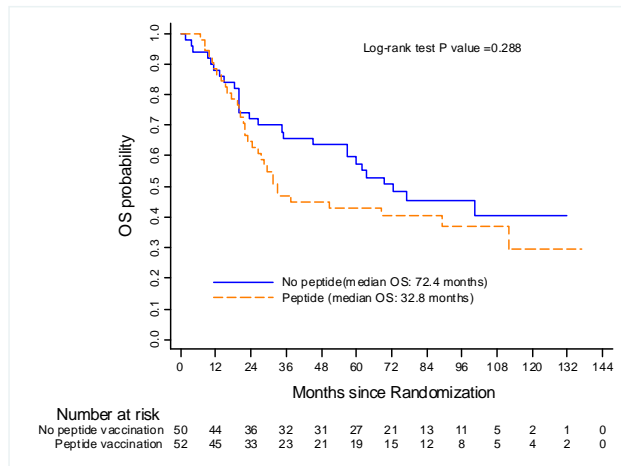

Supplement: supp_JCO.2015.62.0500_DS_2015.620500.pdf [file supp_JCO.2015.62.0500_DS_2015.620500.pdf]
